# Supplementary material for: Different Residues on the Surface of theMethanothermobacter thermautotrophicusMCM Helicase Interact with Single- and Double-Stranded DNA
Source: Hindawi journal article supplement (doi:10.1155/2010/505693), 2010-01-01
Supplement: f1 [file 505693.f1.pdf]

**Supplementary Table 1.** List of primers used to generate mutants

| <b>Mutation</b> | <b>Sequence (5'-3')</b>                                 |
|-----------------|---------------------------------------------------------|
| Q176A F         | TTC CTG GAC ACC GCG ACA CTG AAA CTC                     |
| Q176A R         | GAG TTT CAG TGT CGC GGT GTC CAG GAA                     |
| P210G F         | CTG GTT GAC ACC CTC ACA GGT GGG GAT ATT GTG AGG GTG ACC |
| P210G R         | GGT CAC CCT CAC AAT ATC CCC ACC TGT GAG GGT GTC AAC CAG |
| G211A F         | CTG GTT GAC ACC CTC ACA CCC GCT GAT ATT GTG AGG GTG ACC |
| G211A R         | GGT CAC CCT CAC AAT ATC AGC GGG TGT GAG GGT GTC AAC CAG |
| PG210,211GA F   | CTG GTT GAC ACC CTC ACA GGT GCT GAT ATT GTG AGG GTG ACC |
| PG210,211GA R   | GGT CAC CCT CAC AAT ATC AGC ACC TGT GAG GGT GTC AAC CAG |
| D212A F         | CTC ACA CCC GGG AAT ATT GTG AGG GTG ACC                 |
| D212A R         | GGT CAC CCT CAC AAT ATT CCC GGG TGT GAG                 |
| V214A F         | CCC GGG GAT ATT GCA AGG GTG ACC GGC                     |
| V214A R         | GCC GGT CAC CCT TGC AAT ATC CCC GGG                     |
| G218A F         | GTG AGG GTG ACC GCT ACC CTC AGG ACG                     |
| G218A R         | CGT CCT GAG GGT AGC GGT CAC CCT CAC                     |
