# Supplementary material for: Different Residues on the Surface of theMethanothermobacter thermautotrophicusMCM Helicase Interact with Single- and Double-Stranded DNA
Source: Hindawi journal article supplement (doi:10.1155/2010/505693), 2010-01-01
Supplement: f2 [file 505693.f2.pdf]

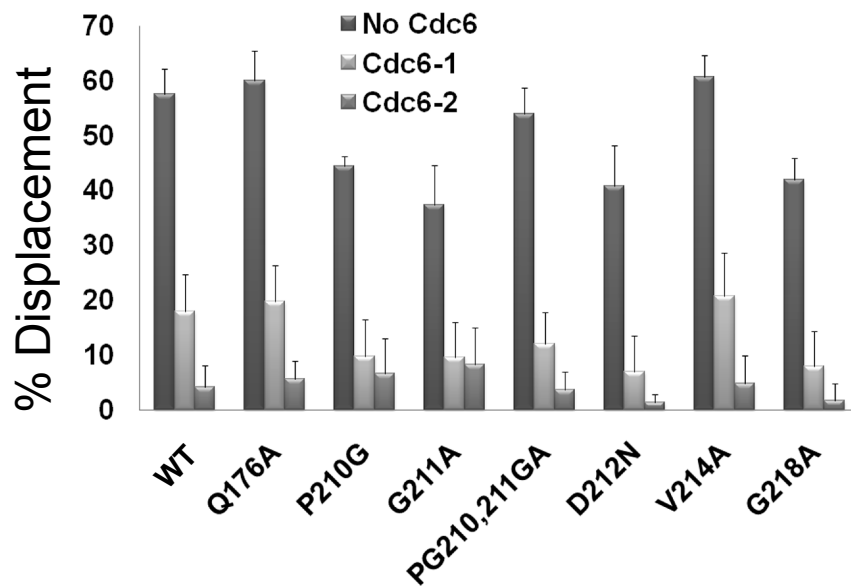

Supplementary Figure 1
